# Supplementary material for: Development and optimisation of a respectful maternal and newborn care bundle in Malawi and Tanzania: A mixed methods study
Source: Research Square preprint supplement (doi:10.21203/rs.3.rs-8365926/v1), 2026-01-21
Supplement: Supplementary file 1 [file 220763dea0071b2baaadc4ef.docx]

| Item Description | Page in manuscript where item is located | Other* |
| --- | --- | --- |
| 1. Report the context for which the intervention was developed. | Page 6 |  |
| 1. Report the purpose of the intervention development process. | Page 5,15-16 |  |
| 1. Report the target population for the intervention development | Page 3-6 |  |
| 1. Report how any published intervention development approach contributed to the development process | Page 7-16, Figure 2 |  |
| 1. Report how evidence from difference sources informed the intervention development process | Page 8-10 |  |
| 1. Report how/if published theory informed the intervention development process | Page 7-8, 14, 26 |  |
| 1. Report any use of components from an existing intervention in the current intervention development process | N/A |  |
| 1. Report any guiding principles, people or factors that were prioritised when making decisions during the intervention development process. | Page 10-14,17-23 |  |
| 1. Report how stakeholders contributed to the intervention development process. | Page 8-14, 17-23 |  |
| 1. Report how the intervention changed in content and format from the start of the intervention development process | Page 22-23 |  |
| 1. Report any changes to interventions required or likely to be required for subgroups. | N/A |  |
| 1. Report important uncertainties at the end of the intervention development process. | Page 17-23 |  |
| 1. Follow TIDieR guidance when describing the developed intervention. | The TIDieR framework was used to describe the intervention. Additional file 2 |  |
| 1. Report the intervention development process in an open access format. | The authors aim to publish this paper in an open access format. |  |

Additional file 1: GUIDED-A guideline for reporting for intervention development studies (Duncan et.al, 2020)
