# Supplementary material for: Development and optimisation of a respectful maternal and newborn care bundle in Malawi and Tanzania: A mixed methods study
Source: Research Square preprint supplement (doi:10.21203/rs.3.rs-8365926/v1), 2026-01-21
Supplement: Supplementary file 2 [file 75f7403ce245395436f4dadf.docx]

**
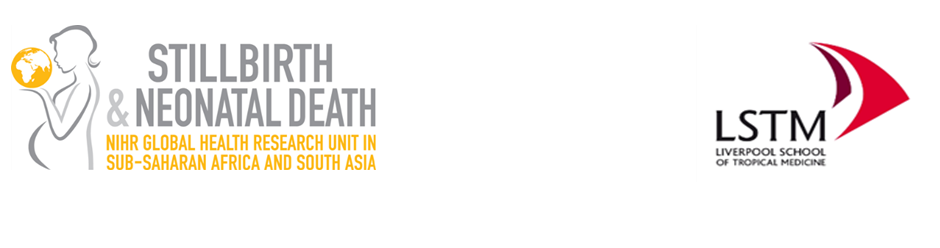
**

**Development, implementation, and evaluation of a respectful maternal and newborn care bundle: A mixed-methods study in Malawi and Tanzania**

Focus Group Topic Guide

(Version 1, 20/01/22: Health worker and Manager)

1. **Introduction, setting ground rules:**

***Introduce self and additional facilitator, thank participants for taking part and confirm they agree to discussion taking place. Ensure environment is comfortable and everyone can see each other; sit in a circle. Discuss the following issues:***

- Review the nature and purpose of the research.
- No right or wrong answers, aim to understand views and experiences.
- Confidentiality, use of data. Encourage participants not to discuss others’ viewpoints outside of the focus group.
- Explain the use of data recorder, transcription, use of pseudonym (invite to choose), use of verbatim quotes, will be taking field notes.
- Explain can decline to answer any question or prompt; can remove themselves from the group at any time if feels need to.
- Explain the importance of letting everyone speak. Request that they show their agreement or disagreement to what others are saying, verbally [to capture on audio-recorder]
- Expected duration of focus group; 90 minutes.
- Check consent form signed.
- Ask if any questions.

***Check recorder working***

Introduce and switch on tape recorder

**General prompts**

- *Allow participant to respond uninterrupted and use open prompts if required to explore aspects of their experiences in depth.*
- *Can you tell me more about XXX?', 'What makes you say XXX?, What impact did that have?*

1. **Opening questions:**

**What do you understand by ‘respectful maternal and newborn care’?**

- *What/who facilitates this?*
- *How is your organisation striving to achieve this for all women and babies?*
- *What would be your vision for your organisation?*

1. **Current practice:**

***Can you tell me about a time when respectful care made a difference in your workplace?***

- *What happened?*
- *How did your colleagues respond?*
- *How did this make you feel?*
- *What did you learn from this experience?*

1. ***Moving forward:***

***Can you tell me about any activities/changes in practice that could increase the number of women and babies experiencing respectful care?***

- *What improvements could be made?*
- *What would it take to create the changes needed?*
- *How could you contribute to this?*
- *Who else could get involved?*
- *How could you get others on board?*

1. ***Improving care and relationships:***

***Is there anything else that could change, that would help you ensure quality of care for women and babies?***

- *Explore: Service organisation factors, staffing, environment, equipment, individual factors; education, mentorship/ role modelling, perceptions/behaviours*

1. ***This research:***

- *How do you feel about participating in this research?*
- *How do you feel about participating in this focus group?*
- *Is there anything else you might want to add?*

*At the close of the focus group, briefly summarise the main points to confirm interpretation with the participants. Ask if they wish to expand any responses or add anything else to the discussion. Thank the participants for their time. Remind them not to discuss what was said in the focus group with anyone else.*

*Ensure participant has contact details for the local research team should they wish to discuss any aspect of the study.*

*Complete reflexive diary/field notes.*
