# Supplementary material for: Development and optimisation of a respectful maternal and newborn care bundle in Malawi and Tanzania: A mixed methods study
Source: Research Square preprint supplement (doi:10.21203/rs.3.rs-8365926/v1), 2026-01-21
Supplement: Supplementary file 3 [file b146b532e14f77fc3a089b02.docx]

**
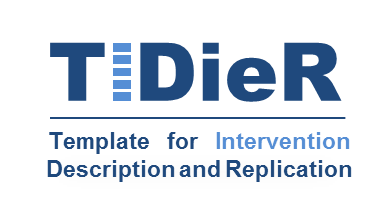
 Additional file 2: The TIDieR (Template for Intervention Description and Replication) Checklist***

| **Item number** | **Item** | **Where located **** | |
| --- | --- | --- | --- |
|  | Primary paper  (page or appendix  number) | Other † (details) |
|  | **BRIEF NAME** |  |  |
| **1.** | Provide the name or a phrase that describes the intervention. | Page 5,14-15 | ______________ |
|  | **WHY** |  |  |
| **2.** | Describe any rationale, theory, or goal of the elements essential to the intervention. | Page 3-5 | _____________ |
|  | **WHAT** |  |  |
| **3.** | Materials: Describe any physical or informational materials used in the intervention, including those provided to participants or used in intervention delivery or in training of intervention providers. Provide information on where the materials can be accessed (e.g. online appendix, URL). | Available upon request | Contact the corresponding author |
| **4.** | Procedures: Describe each of the procedures, activities, and/or processes used in the intervention, including any enabling or support activities. | Appendix 1-intervention plan | _____________ |
|  | **WHO PROVIDED** |  |  |
| **5.** | For each category of intervention provider (e.g. psychologist, nursing assistant), describe their expertise, background and any specific training given. | Appendix 1-intervention plan | _____________ |
|  | **HOW** |  |  |
| **6.** | Describe the modes of delivery (e.g. face-to-face or by some other mechanism, such as internet or telephone) of the intervention and whether it was provided individually or in a group. | Appendix 1-intervention plan | _____________ |
|  | **WHERE** |  |  |
| **7.** | Describe the type(s) of location(s) where the intervention occurred, including any necessary infrastructure or relevant features. | Page 5, Appendix 1-intervention plan | _____________ |
|  | **WHEN and HOW MUCH** |  |  |
| **8.** | Describe the number of times the intervention was delivered and over what period of time including the number of sessions, their schedule, and their duration, intensity or dose. | N/A | _____________ |
|  | **TAILORING** |  |  |
| **9.** | If the intervention was planned to be personalised, titrated or adapted, then describe what, why, when, and how. | Pg.15-23 Optimisation outcome | _____________ |
|  | **MODIFICATIONS** |  |  |
| **10.** | If the intervention was modified during the course of the study, describe the changes (what, why, when, and how). | Pg.15-23  Optimisation outcome | _____________ |
|  | **HOW WELL** |  |  |
| **11.** | Planned: If intervention adherence or fidelity was assessed, describe how and by whom, and if any strategies were used to maintain or improve fidelity, describe them. | N/A | _____________ |
| **12.** | Actual: If intervention adherence or fidelity was assessed, describe the extent to which the intervention was delivered as planned. | N/A | _____________ |

** **Authors** - use N/A if an item is not applicable for the intervention being described.

† If the information is not provided in the primary paper, give details of where this information is available. This may include locations such as a published protocol or other published papers (provide citation details) or a website (provide the URL).

* We strongly recommend using this checklist in conjunction with the TIDieR guide (see *BMJ* 2014;348:g1687) which contains an explanation and elaboration for each item.

Appendix 1: Intervention plan

| **INTERVENTION BUNDLE** | **COMPONENTS** | **WHERE?** | **WHO?** | **WHEN?** | **ACTIONS** |
| --- | --- | --- | --- | --- | --- |
| **1.Privacy and Confidentiality** | - - Availability/use of screens, gowns and hospital linen to protect women and newborns privacy   -Training HCWs on confidentiality (physical and verbal)   - -Identify Private room/area to discuss sensitive issues - -Availability of a bereavement room - -Limiting number of students /clinical observers during procedures - - keeping patients files secured | Antenatal, Labour ward, operating theatre, postnatal and Nursery wards within the study facilities | -Research team  -AIGs/ respectful care champions  -Administration  -Hospital managers  -procurement office  -Health care workers  -All support staff  -Students  -Educators | Implement from July 2023 and beyond | -Ward managers to reinforce staff on use of screens, curtains during examinations, delivery  - Get costs of curtains and screens  - Maintain/repair/Purchase screens (Each facility management team to advise research team)  -Buy curtains, screens and gowns where not available or inadequate  -Each facility to identify a bereavement room/corner  -Research team and TOTs to train healthcare workers and support staff on privacy and confidentiality  - Ward in charge to ensure split shifts of students to minimise traffic i.e. some students could take night shifts  -Hospital management to co-develop a charter with educators to limit number of clinical observers during procedures  - Devise a mechanism of ensuring that patients files are not accessed any how i.e. only releasing them when need like during ward rounds, having locked cupboards  -Reinforce consent seeking and explanations before any procedure. |
| **2.Training/Mentorship** | Training HCWs on  -Respectful maternal and new-born care along with behaviour change techniques (TOT and then on job training/ CPD sessions to other HCWs at the respective facilities )  -Tailored RMNC training to Support staff –cleaners, guards, receptionist etc.)  RMNC training topics   1. Overview of maternal health disrespect and abuse during childbirth 2. RMNC Charter; Universal rights of women and newborn 3. Skills and attitude to promote respectful maternity care 4. Professional ethics and code of conduct 5. Customer care in maternal and newborn care services 6. Provider client communication during maternal and newborn care services 7. Privacy and confidentiality | Mitundu, Bwaila and Ethel Mutharika health facilities –Malawi  Bugando medical center, Geita Regional referral hospital and Nyerere Designated District Hospital -Tanzania | Research Team to facilitate trainer of trainers (AIGs/Respectful care champions )  -AIGs (TOT) to conduct training of HCWs in the Antenatal, Labour and PN wards and to support staff  -Involve CPD coordinator, hospital administrators | Mid June 2023 Thereafter, other sites in Tanzania and Malawi management to continue coordinating quarterly CPD trainings for the three research sites. | -Research team to identify/develop training materials on RMNC (LN,IC and others), by end of March, 2023  - Get costs for developing training materials  - Payment for producing developed training materials  -Training optimization at Haydom Lutheran Hospital in Tanzania  - Identify venues for the trainings  -Research team to budget for the training  -Research team to facilitate the trainings  -TOTs to facilitate trainings on their respective facilities |
| **3.Valuing staff** | -Providing tea and coffee and supporting breaks.  -Recognition of most respectful maternity and neonatal care employee (Staff awards).  -planning annual leave  -Appreciation of peers  -Provision of name badges  Celebrating and share best practice  Care of the carers –Identify a person within the facility to listen to staff/ counsellor | Maternity area within the six study sites facilities. Mitundu, Bwaila and Ethel Mutharika  Hospitals-Malawi  Bugando medical center, Geita Regional referral hospital and Nyerere Designated District Hospital -Tanzania | -Hospital management, administrators and ward managers/ in-charges, ----Procurement office  -Counsellors  -Hospital chaplain/religious leaders  - Healthcare workers  - Research team | July, 2023 and beyond | - Management to facilitate tea breaks for staff  -Tea and snacks provision in all shifts  -Budget for tea and snacks  -Create or use the available committee responsible for best employee award within the study sites facilities  -committee to set criteria for awarding best performing staff  -Design and procure certificate of recognition for the staff award  -Provide certificate of recognition monthly to best RMNC performer and a day off bonus  -Ward in charge to carefully plan for staff to go on annual leave  -Budget for staff nametags  -Supply name tags where not available  Design and supply appreciation boards  Staff to identify a person /counsellor within the facility to listen to staff. |
| **4.Supportive Leadership** | -Training on leadership  -Mentorship  -Leaders engaging in reflective practices on their leadership  -Training leaders on RMNC  -Mentorship of leaders in supportive supervision  -Mentoring leaders on leadership roles  -Monitoring and evaluation of implementation of RMNC activities  -Incorporate RMNC into ward policies  - Learning and sharing experiences amongst the three research facilities on RMNC  -Resource mobilization and management | All the study sites Malawi and Tanzania  Mitundu, Bwaila and Ethel Mutharika health facilities –Malawi  Bugando medical center, Geita Regional referral hospital and Nyerere Designated District Hospital -Tanzania | Research Team to facilitate leadership training  Managers, In-charges administrators, HODs, hospital supervisors | Implement from July 2023 and beyond | -Research team to source/develop training materials for the Leadership Training ( Tina and others )  -Budget for producing materials for the training and the training cost.  -Identify of participants for the leadership training  -Research team to facilitate the leadership training and mentorship  -Support Leaders reflective practices  -Institutional leadership and matrons to facilitate incorporating RMNC activities into ward protocols |
| **5. Community Engagement and Involvement** | -Engage community leaders/gatekeepers in breaking cultural barriers in seeking care  -Raising awareness in communities through CEI members about respectful maternal and newborn care  -Educating women on RMNC and human rights-facility and community level (local media-radio)  -Facilitating women to raise concerns-facility level and community level (local media-radio) | Antenatal clinic  Labour ward  Postnatal ward  Communities around the study sites | Research team, CEI members and Healthcare workers  Community midwifery assistants (CMAs) –Malawi  Health Surveillance assistants -Malawi  Deputy Director of Nursing services  Hospital managers/administrators  Area Development Committees (at community level)  Community gatekeepers | Implement from July 2023 and beyond | -AIG members/RCC to facilitate health education/awareness services at the Antenatal clinic on RMNC and client rights  -Engage community health workers and gatekeepers in RMNC activities at community level (community mobilisations/sensitizations) -Malawi  -Identify places for posters, budget and prepare posters,  -Identify persons to lead and plan RMNC talks in every meeting  Design messages for the media-radio, health talk /education plan-Tanzania  -Prepare schedule and budget for community visits for RMNC sensitisation  -Budget for media coverage (local radio) |
