# Supplementary figures and images for: Development and optimisation of a respectful maternal and newborn care bundle in Malawi and Tanzania: A mixed methods study
Source: Research Square preprint supplement (doi:10.21203/rs.3.rs-8365926/v1), 2026-01-21

Supplementary file 3


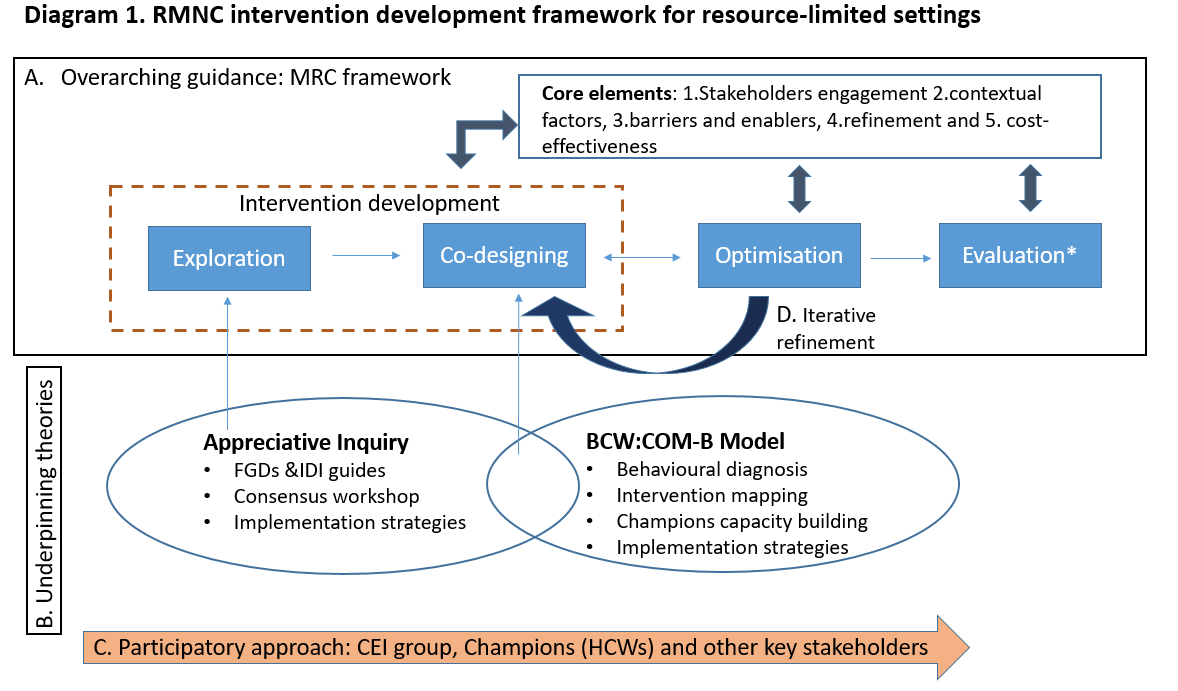

Supplement: Supplementary file 4 [file b3c85a5531b0a623b0bd55e4.docx]
